# Supplementary material for: Dressings Combined with Injection of Meglumine Antimoniate in the Treatment of Cutaneous Leishmaniasis: A Randomized Controlled Clinical Trial
Source: PubMed Central journal article supplement (PMC3691234; doi:10.1371/journal.pone.0066123), 2013-06-24
Supplement: pone.0066123.s002.pdf [file pone.0066123.s002.pdf]

## CONSORT 2010 Flow Diagram

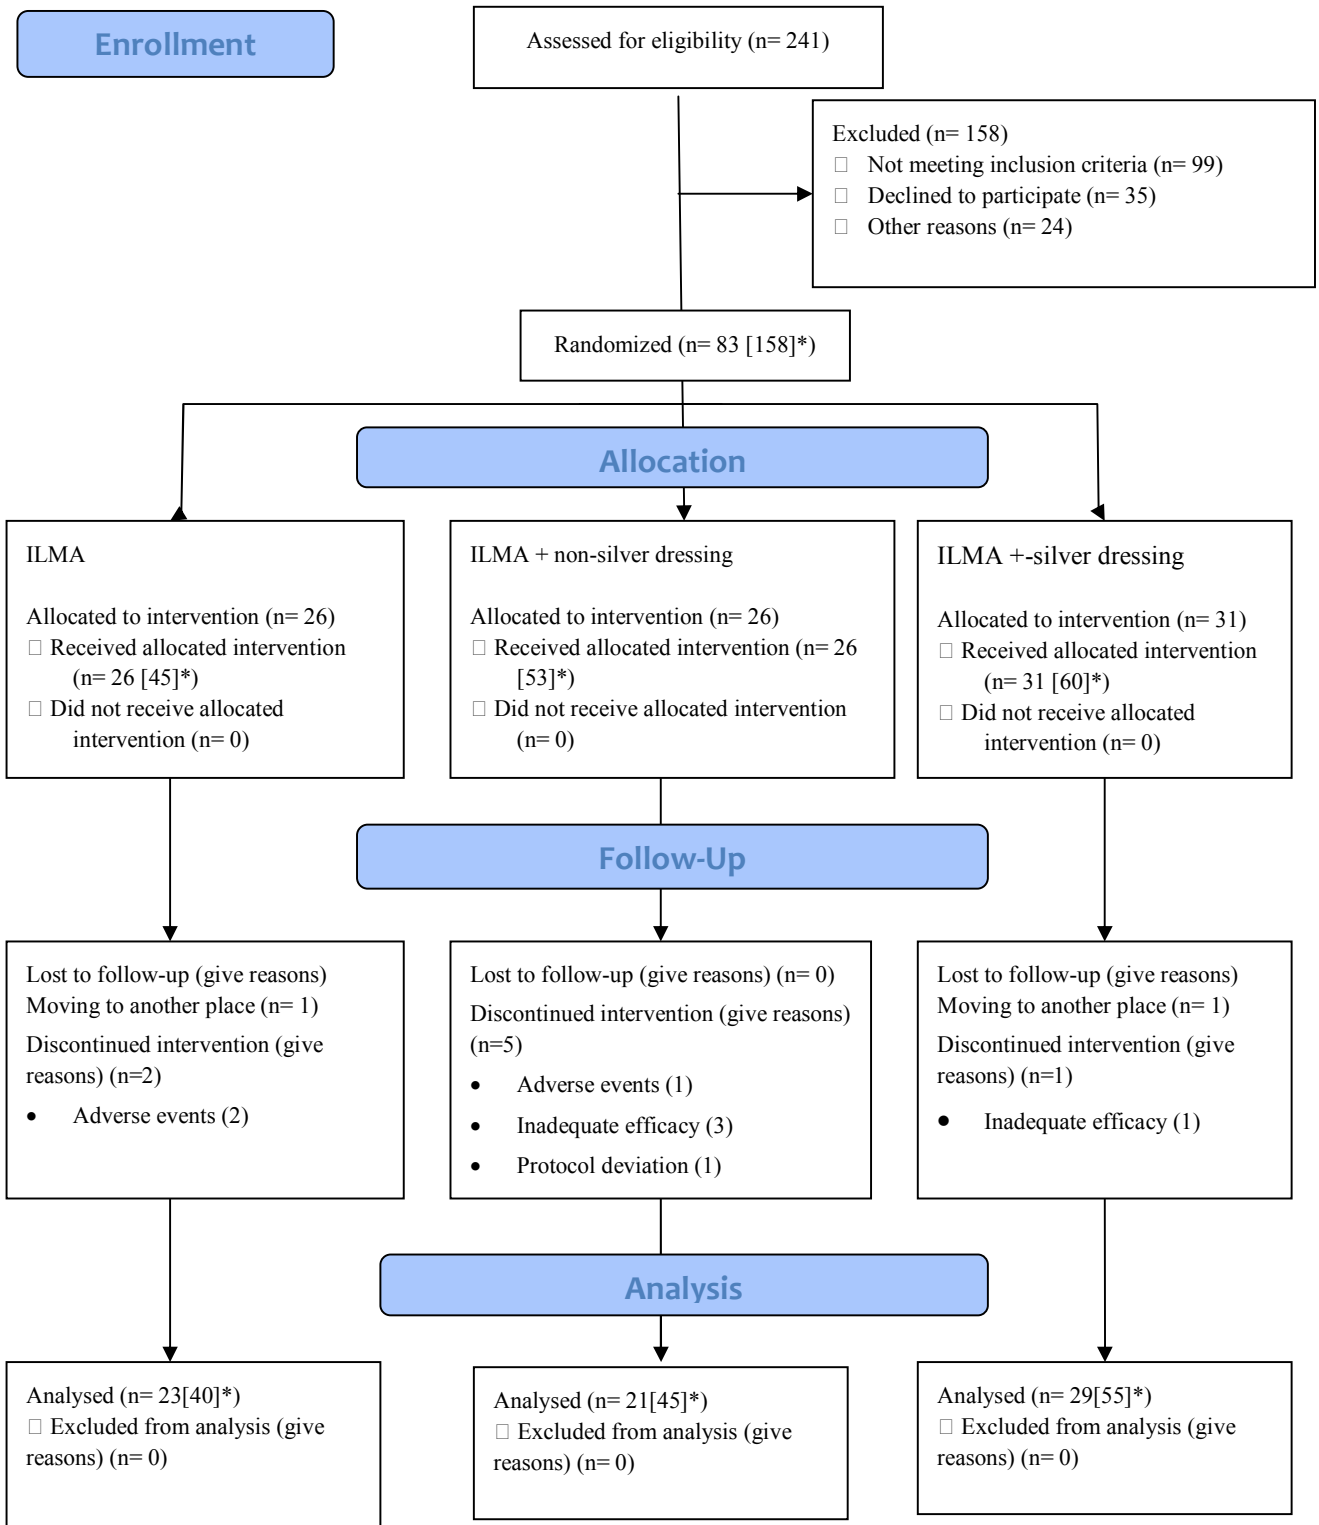

\*Number of the lesions. †ILMA=Intralesional meglumine antimoniate.
